# Supplementary material for: Dynamic fingerprinting of sub-cellular nanostructures by image mean square displacement analysis
Source: PubMed Central journal article supplement (PMC5665924; doi:10.1038/s41598-017-13865-4), 2017-11-01
Supplement: 41598_2017_13865_MOESM1_ESM.pdf [file 41598_2017_13865_MOESM1_ESM.pdf]

1 **Supplementary Information**

2 **Dynamic fingerprinting of sub-cellular nanostructures by image mean square displacement**  
3 **analysis**

4 Luca Digiacomo<sup>a,\*</sup>, Francesca D'Autilia<sup>b,\*</sup>, William Durso<sup>b</sup>, Paolo Maria Tentori<sup>b</sup>, Giulio  
5 Caracciolo<sup>a,†</sup>, Francesco Cardarelli<sup>c,†</sup>

6

7 <sup>a</sup>Department of Molecular Medicine, "La Sapienza" University of Rome, Italy.

8 <sup>b</sup>Center for Nanotechnology Innovation@NEST, Istituto Italiano di Tecnologia, Pisa, Italy.

9 <sup>c</sup>NEST - Scuola Normale Superiore, Istituto Nanoscienze - CNR (CNR-NANO), Pisa, Italy.

10 \* These authors equally contributed

11 † To whom correspondence should be addressed: [giulio.caracciolo@uniroma1.it](mailto:giulio.caracciolo@uniroma1.it),

12 [francesco.cardarelli@nano.cnr.it](mailto:francesco.cardarelli@nano.cnr.it)

13

14 **Supplementary Figures**

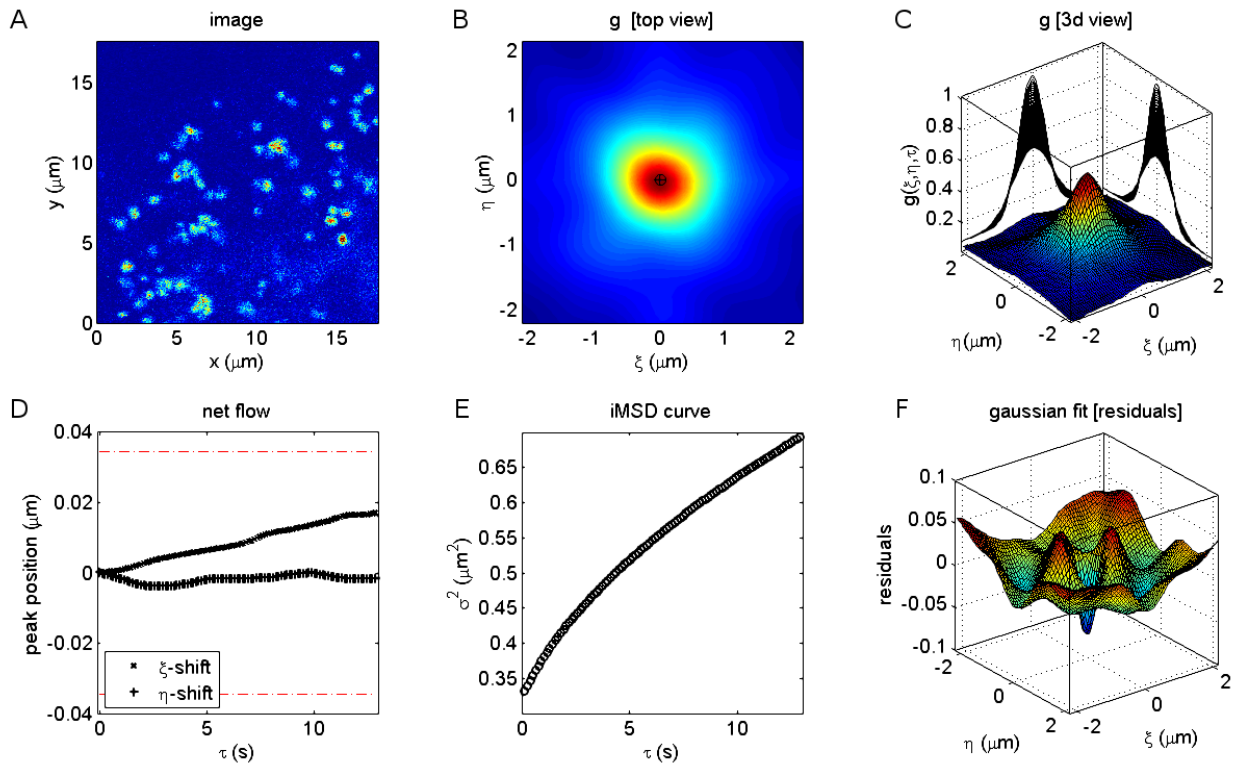

15

16 **Supplementary Figure 1** A) Representative image from the time-lapse B) Top view of the  
 17 calculated spatiotemporal correlation function C) 3D view of the spatiotemporal correlation  
 18 function, with projections D) Net movement of the peak of the spatiotemporal correlation function  
 19 E) *i*MSD trace F) Gaussian fit residuals

20

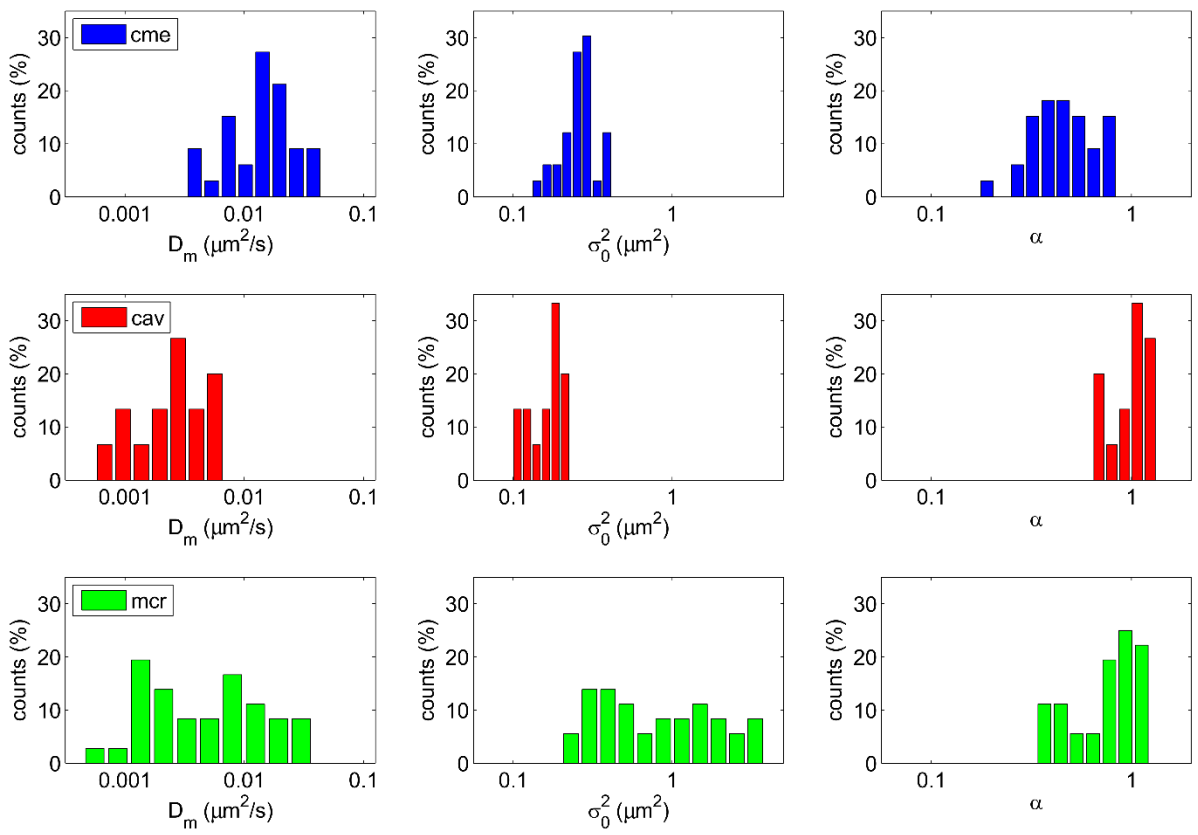

21

22 **Supplementary Figure 2** Distributions of  $D_m$ ,  $\sigma_0^2$ , and  $\alpha$  values for clathrin-mediated endocytosis

23 (first row, blue), caveolae (second row, red), and early micropinocytosis (third row, green)

24

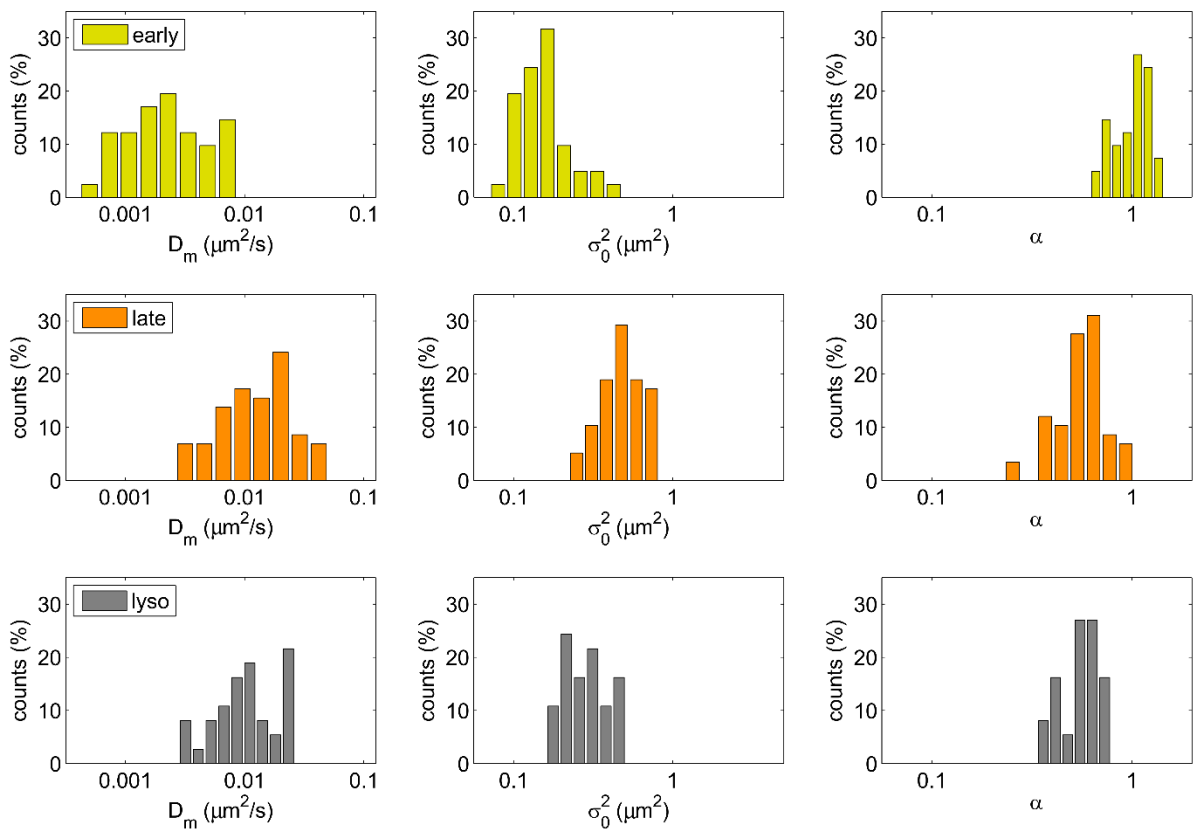

25

26 **Supplementary Figure 3** Distributions of  $D_m$ ,  $\sigma_0^2$ , and  $\alpha$  values for early endosomes (first row,  
 27 dark yellow), late endosomes (second row, orange), and lysosomes (third row, grey)

28

29

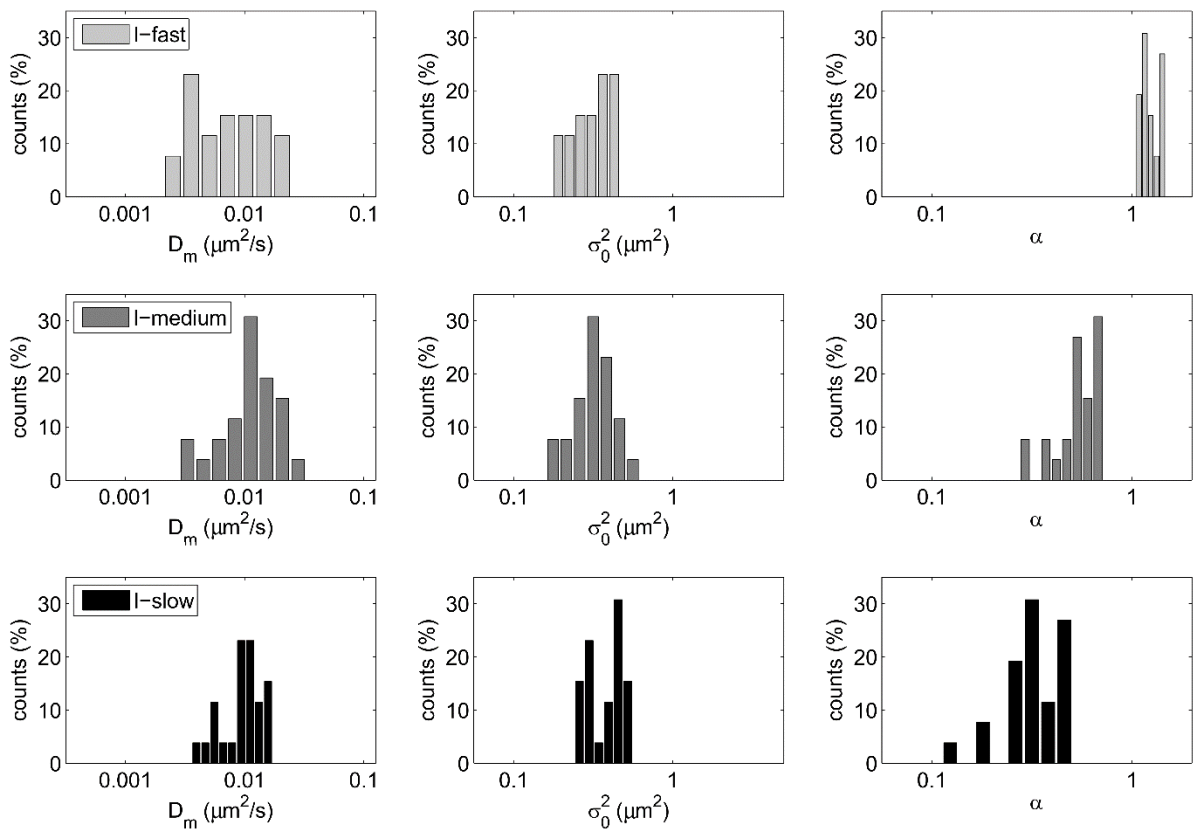

30

31 **Supplementary Figure 4** Distributions of  $D_m$ ,  $\sigma_0^2$ , and  $\alpha$  values for lysosomes in the 0-6 sec time  
 32 window (first row, light grey), 0-12 sec time window (second row, dark grey), and 0-60 sec time  
 33 window (third row, black)

34

35

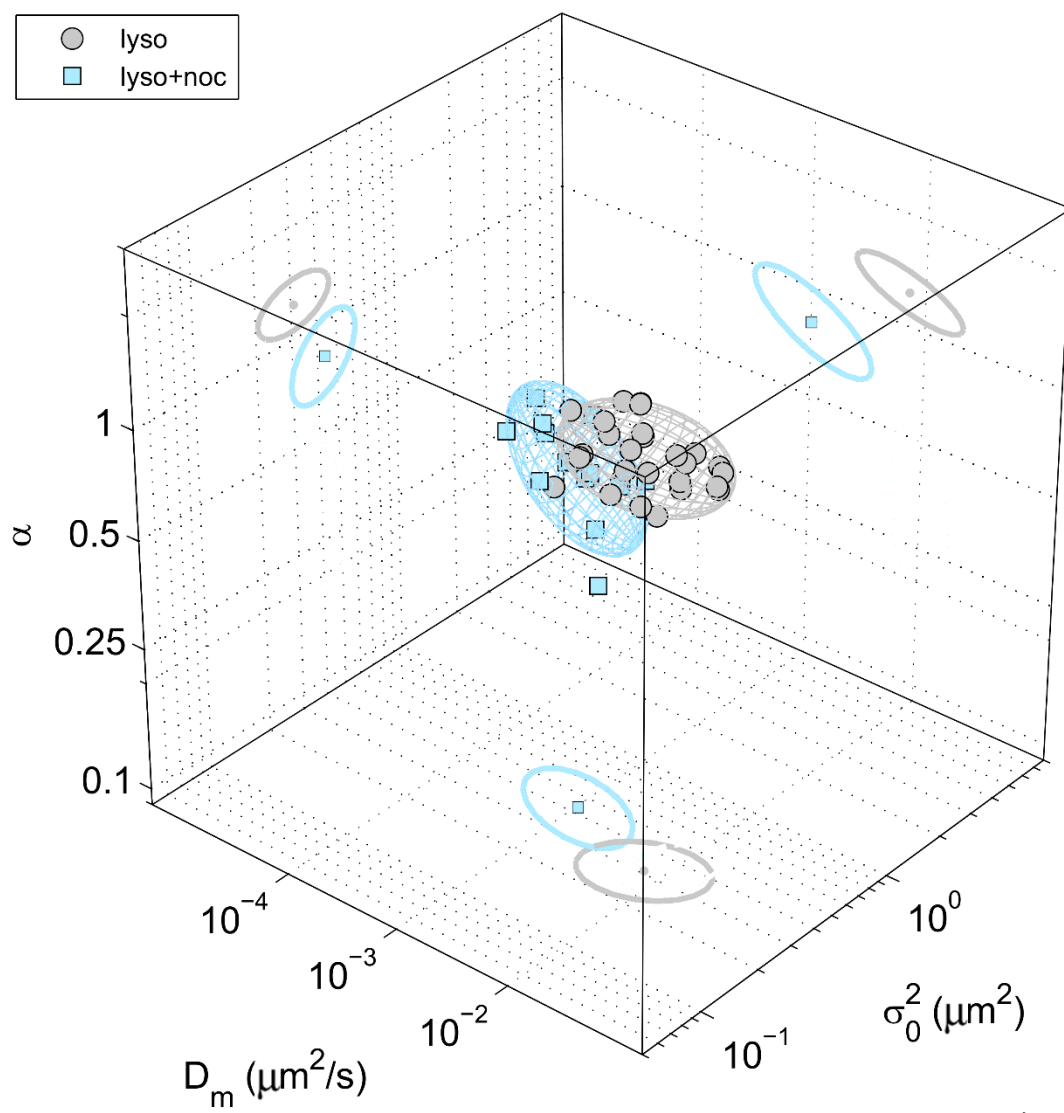

36

37 **Supplementary Figure 5** 3D plot of experimental data points for lysosomes treated with

38 Nocodazole (cyan), as compared to the control (grey).

39

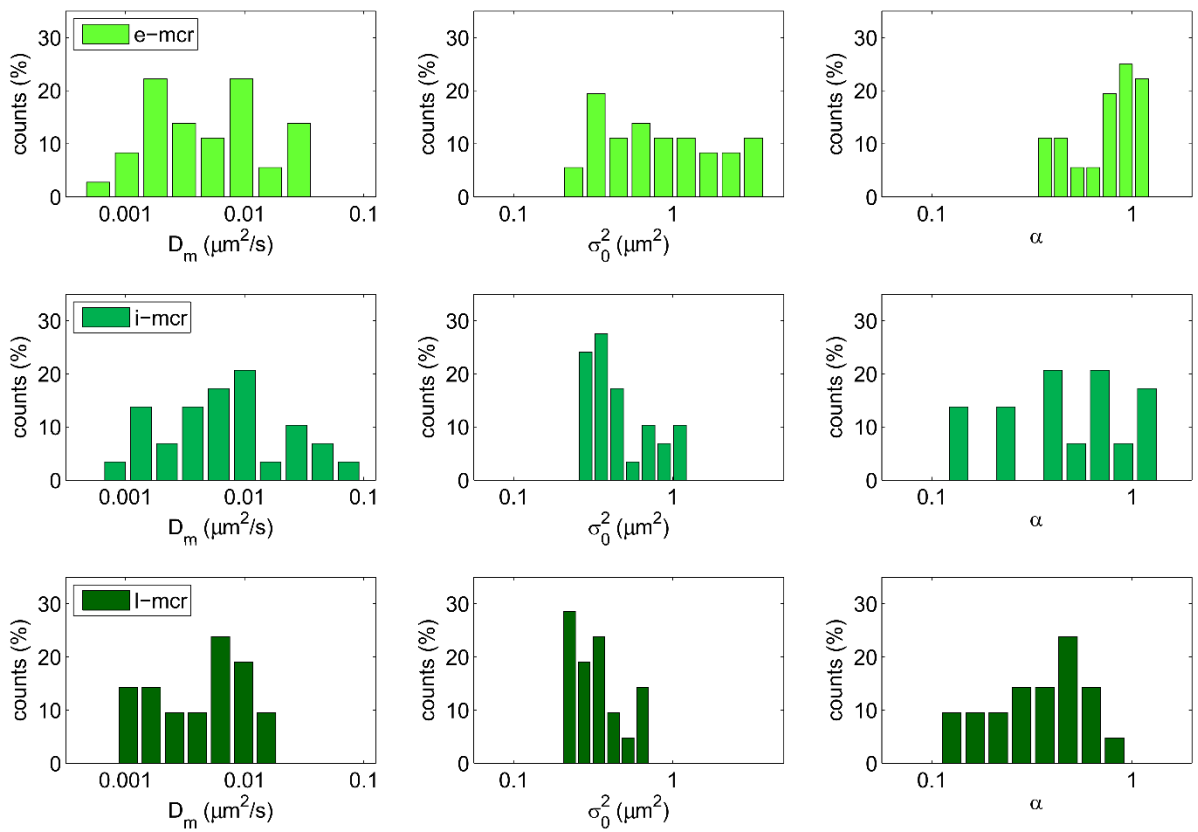

40

41 **Supplementary Figure 6** Distributions of  $D_m$ ,  $\sigma_0^2$ , and  $\alpha$  values for macropinosomes at different  
 42 stages of trafficking, namely: early (30-70 min; first row, light green), intermediate (80-120 min;  
 43 second row, green), and late (>120 min, third row, dark green)

44

45

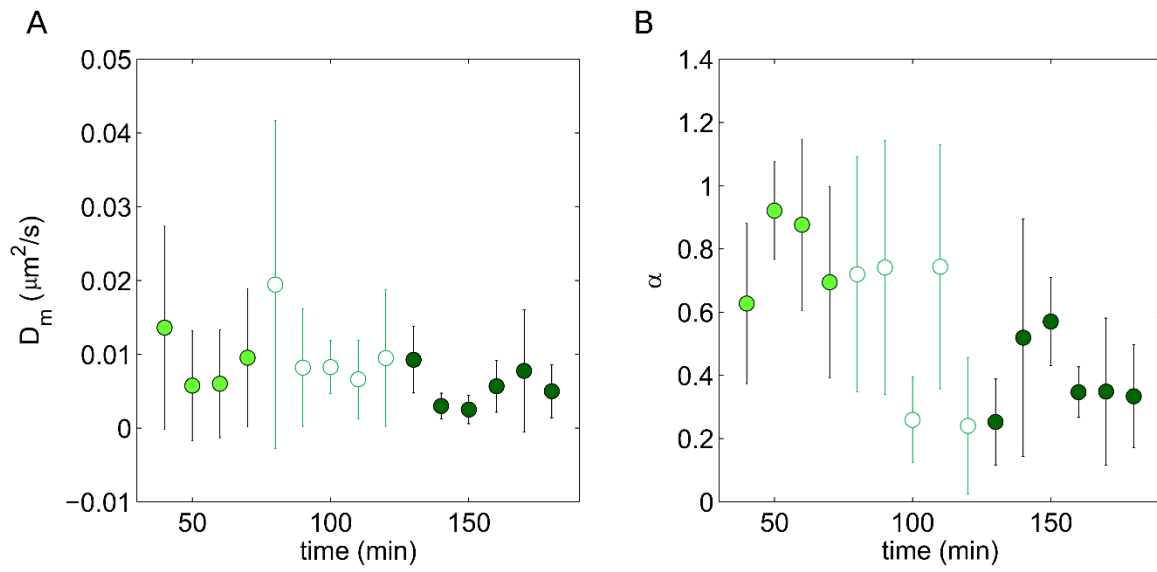

46

47 **Supplementary Figure 7** A) Statistics on the average local diffusivity ( $D_m$ ) of macropinosomes

48 observed at the different time points. B) Statistics on the average anomalous coefficient ( $\alpha$ ) of

49 macropinosomes observed at the different time points.

50

51
